# Supplementary material for: Identification of Key Components Responsible for the Aromatic Quality of Jinmudan Black Tea by Means of Molecular Sensory Science
Source: MDPI journal article supplement (doi:10.3390/foods12091794), 2023-04-26
Supplement: s1 [file s1]

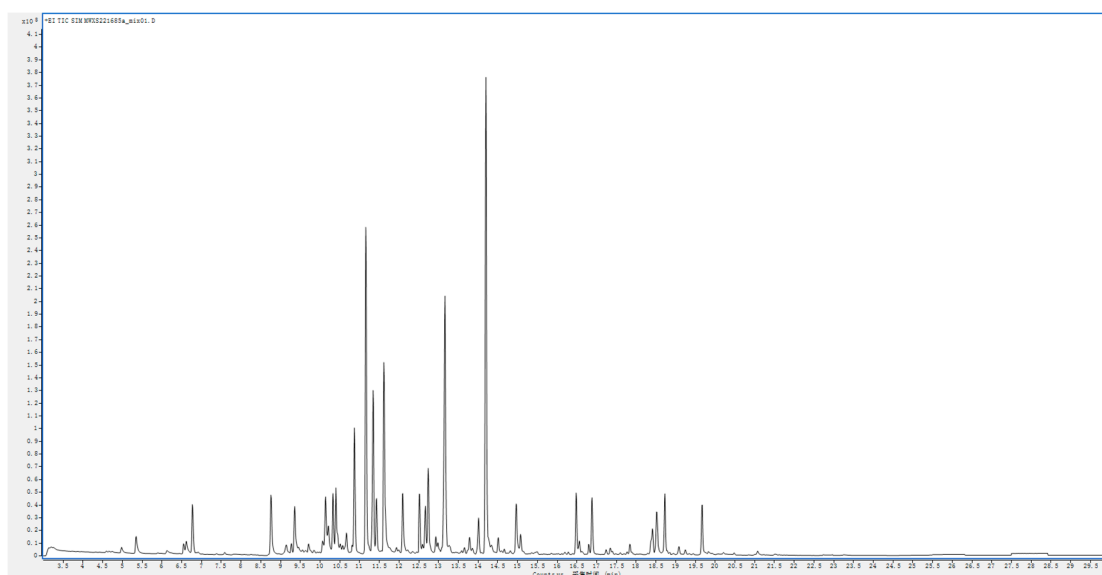

**Figure S1.** The total ion current of the samples. The horizontal ordinate represents the retention time(Rt) of the volatile components, the vertical axis represents the ion current intensity for ion detection(cps, count per second).

**Table S1.** Color difference of the JBT and FBT infusions.

|    | JBT1                     | JBT2                       | JBT3                     | JBT4                     | JBT5                       | JBT6                     | JBT7                     | JBT8                    | JBT9                     | JBT10                    | FBT1                     | FBT2                       | FBT3                     |
|----|--------------------------|----------------------------|--------------------------|--------------------------|----------------------------|--------------------------|--------------------------|-------------------------|--------------------------|--------------------------|--------------------------|----------------------------|--------------------------|
| L* | 27.25±0.03 <sup>Bb</sup> | 26.96±0.01 <sup>CcDd</sup> | 27.19±0.01 <sup>Bb</sup> | 27.81±0.01 <sup>Aa</sup> | 27.15±0.01 <sup>BCbc</sup> | 26.47±0.2 <sup>Dd</sup>  | 25.92±0.05 <sup>Ff</sup> | 25.5±0.02 <sup>Gg</sup> | 25.67±0.01 <sup>Gg</sup> | 27.94±0.01 <sup>Aa</sup> | 26.94±0.01 <sup>Dd</sup> | 26.98±0.02 <sup>CcDd</sup> | 26.80±0.02 <sup>Cc</sup> |
| a* | 2.38±0.01 <sup>Aa</sup>  | 2.28±0.02 <sup>Aa</sup>    | 2.26±0.02 <sup>Aa</sup>  | 2.61±0.3 <sup>Aa</sup>   | 2.39±0.02 <sup>Aa</sup>    | 2.42±0.10 <sup>Aa</sup>  | 2.35±0.08 <sup>Aa</sup>  | 2.37±0.03 <sup>Aa</sup> | 2.35±0.01 <sup>Aa</sup>  | 2.44±0.01 <sup>Aa</sup>  | 2.19±0.01 <sup>Aa</sup>  | 2.33±0.06 <sup>Aa</sup>    | 2.19±0.01 <sup>Aa</sup>  |
| b* | -0.18±0.02 <sup>Ee</sup> | -0.63±0.2 <sup>Ii</sup>    | -0.67±0.02 <sup>Ii</sup> | 0.55±0.01 <sup>Bb</sup>  | -0.05±0.02 <sup>Dd</sup>   | -0.17±0.02 <sup>Ee</sup> | 0.63±0.01 <sup>Aa</sup>  | -0.3±0.02 <sup>Ff</sup> | 0.05±0.01 <sup>Cc</sup>  | -0.92±0.02 <sup>Kk</sup> | -0.53±0.02 <sup>Hh</sup> | -0.37±0.01 <sup>Gg</sup>   | -0.75±0.02 <sup>Ji</sup> |

The capital letters represents extremely significant difference between samples and the lowercase letters represents significant difference between samples.
